# Supplementary material for: Kidney Involvement in Patients With Chronic Myelomonocytic Leukemia or BCR-ABL–Negative Myeloproliferative Neoplasms
Source: PubMed Central journal article supplement — Kidney Int Rep. 2020 Dec 14;6(3):737–45. doi: 10.1016/j.ekir.2020.12.005 (PMC7938079; doi:10.1016/j.ekir.2020.12.005), 2020-12-14
Supplement: mmc1.pdf [file mmc1.pdf]

|    | Age | Hematological         | Clinical history |                                            |                                             | Kidney pathology                  |                     |                                                |                     |                                   |                  |                                     |                   |                          |
|----|-----|-----------------------|------------------|--------------------------------------------|---------------------------------------------|-----------------------------------|---------------------|------------------------------------------------|---------------------|-----------------------------------|------------------|-------------------------------------|-------------------|--------------------------|
|    |     | Malignancy (mutation) | Diabetes         | Other risk factors                         | Chronic inflammatory syndrome (CRP in mg/L) | Diagnosis                         | Mesangial sclerosis | Extra-medullary haematopoiesis (CD61 staining) | Immune deposits     | Type of interstitial infiltration | Arteriosclerosis | Degree of Interstitial fibrosis (%) | Lysozyme staining | Lysozyme in urine (mg/L) |
| 1  | 75  | CMML-1 Del (7q)       | no               | no                                         | yes (57)                                    | FSGS; AIN                         | mild                | Glomeruli and Interstitium (+)                 | none                | none                              | mild             | 20                                  | NA                | NA                       |
| 2  | 69  | CMML-2 N/A            | no               | no                                         | yes (22)                                    | CTIN                              | none                | none (-)                                       | none                | none                              | none             | 20                                  | NA                | NA                       |
| 3  | 79  | CMML-1 N/A            | no               | HTA                                        | yes (33)                                    | AIN; T-cells infiltrate           | none                | none (NA)                                      | none                | T cells                           | none             | massive destruction                 | NA                | NA                       |
| 4  | 79  | CMML-0 KITD816        | yes              | HTA                                        | no                                          | AIN                               | mild                | Interstitial (+)                               | none                | none                              | severe           | 20                                  | Unspecific        | Uninterpretable          |
| 5  | 66  | CMML-0 ASXL1          | no               | dyslipidemia                               | yes (74)                                    | AIN, massive infiltration by CMML | none                | Glomeruli and Interstitium (NA)                | N/A                 | CMML monocytes                    | none             | Interstitial oedema                 | NA                | 20                       |
| 6  | 63  | CMML-1 N/A            | no               | no                                         | no                                          | FSGS                              | none                | Glomeruli (+)                                  | N/A                 | none                              | none             | 10                                  | Unspecific        | 120                      |
| 7  | 75  | CMML-1 X chro.        | no               | no                                         | yes (23)                                    | CTIN                              | none                | none                                           | none                | none                              | none             | 20                                  | Negative          | NA                       |
| 8  | 72  | CMML-0 JAK2           | yes              | HTA and ischemic cardiomyopathy            | Yes (16)                                    | Massive EMH                       | none                | Glomeruli and Interstitium (+)                 | none                | massive EMH                       | none             | 0                                   | Uninterpretable   | Uninterpretable          |
| 9  | 40  | ET CALR               | no               | no                                         | no                                          | IgAN; FSGS                        | mild                | none                                           | IgAλ                | none                              | none             | <5                                  | (+)               | NA                       |
| 10 | 84  | ET JAK2               | no               | HTA and arteriopathy                       | NA                                          | AA Amyloidosis; CTIN              | none                | none                                           | N/A                 | none                              | none             | 50                                  | NA                | (-)                      |
| 11 | 86  | ET None               | no               | HTA                                        | no                                          | N/A                               | N/A                 | N/A                                            | N/A                 | N/A                               | N/A              | N/A                                 | NA                | NA                       |
| 12 | 56  | ET None               | no               | HTA and ischemic cardiomyopathy            | no                                          | IgAN                              | severe              | none                                           | IgA C3              | none                              | mild/severe      | 50                                  | NA                | NA                       |
| 13 | 80  | ET JAK2               | yes              | HTA and ischemic cardiomyopathy            | no                                          | FSGS                              | mild                | Glomeruli and Interstitium (+)                 | none                | none                              | mild             | 10                                  | (++)              | NA                       |
| 14 | 74  | ET MPL, DNMT3A        | no               | HTA, smoking                               | yes (200)                                   | CTIN                              | mild                | none (-)                                       | none                | none                              | mild             | 20                                  | (+)               | NA                       |
| 15 | 67  | ET JAK2               | no               | HTA, dyslipidemia, ischemic cardiomyopathy | no                                          | N/A                               | N/A                 | N/A                                            | N/A                 | N/A                               | N/A              | N/A                                 | NA                | NA                       |
| 16 | 59  | PV Tri. 8             | no               | Obesity                                    | yes (19)                                    | N/A                               | N/A                 | N/A                                            | N/A                 | N/A                               | N/A              | N/A                                 | NA                | NA                       |
| 17 | 65  | pMF JAK2              | no               | no                                         | yes (84)                                    | N/A                               | N/A                 | N/A                                            | N/A                 | N/A                               | N/A              | N/A                                 | NA                | NA                       |
| 18 | 71  | sMF (PV) JAK2         | no               | HTA, dyslipidemia                          | no                                          | FSGS                              | mild                | none (-)                                       | IgM, C3, C1q (rare) | none                              | mild             | 20                                  | (+)               | NA                       |
